# Supplementary material for: Structural and Optical Properties of NiO/ZnS Core–Shell Nanostructures for Efficient Quantum Dot Light-Emitting Diodes
Source: MDPI journal article supplement (doi:10.3390/ma16145106), 2023-07-20
Supplement: s1 [file s1]

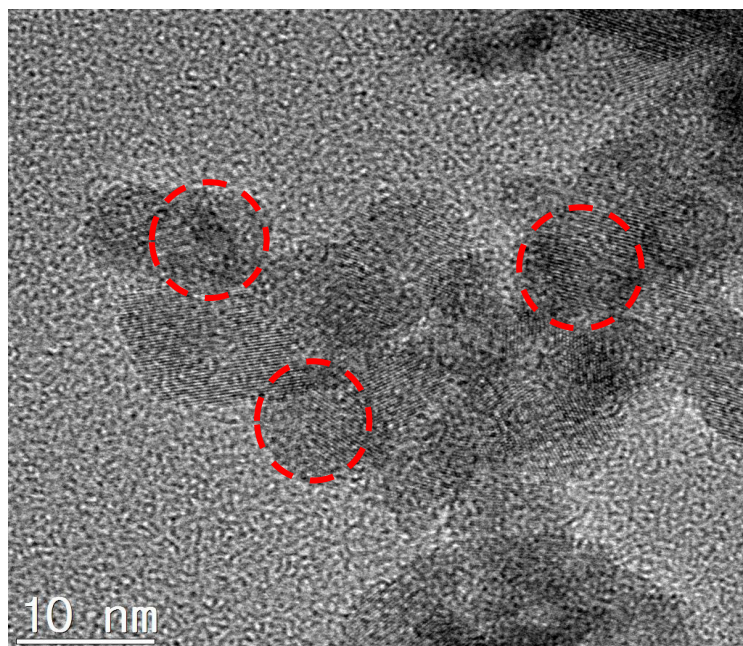

Figure S1. A TEM image (scale bar, 10 nm) of NiO/ZnS nanostructures.

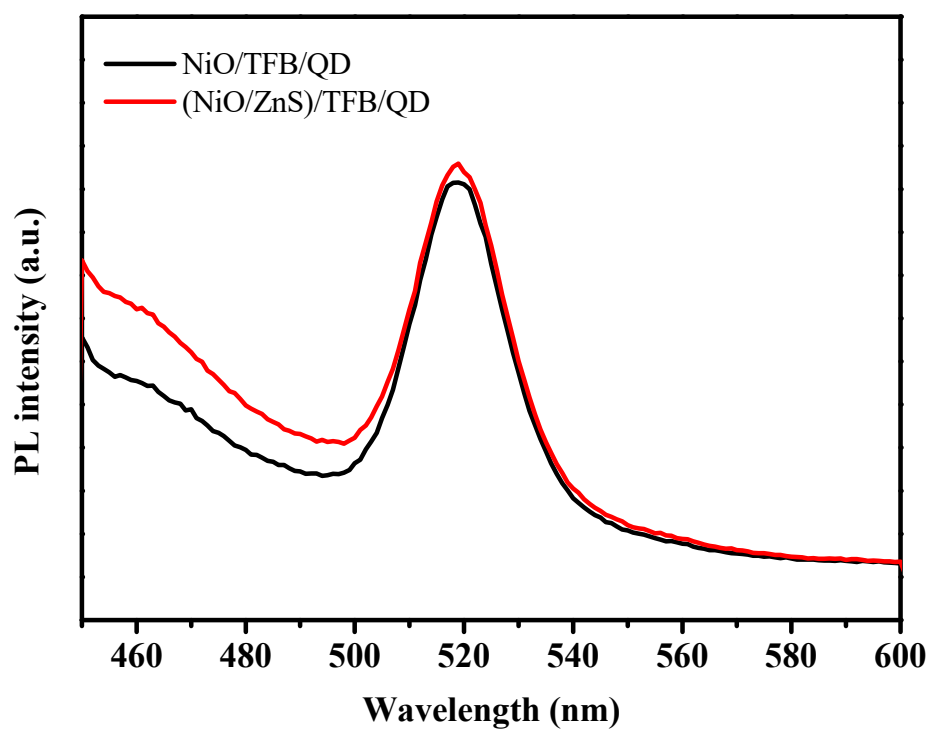

Figure S2. PL spectra of glass/(NiO/ZnS)/TFB/QD and glass/NiO/TFB/QD.
